# Supplementary material for: EphrinB2 in excitatory neurons and astrocytes in the basolateral amygdala controls long-term fear memory formation
Source: PubMed Central journal article supplement — Commun Biol. 2024 Sep 17;7:1165. doi: 10.1038/s42003-024-06844-9 (PMC11408618; doi:10.1038/s42003-024-06844-9), 2024-09-17
Supplement: 42003_2024_6844_MOESM2_ESM.pdf [file 42003_2024_6844_MOESM2_ESM.pdf]

## Description of Additional Supplementary Files

**File name:** Supplementary Data 1

**Description:** The source data behind the graphs in the paper
